# Supplementary material
Source: MDPI journal article supplement (https://www.mdpi.com/2226-4310/3/4/45)
Supplement: s1 [file s1]

Archive with 2 entries (2 files):
- bluntedCone.tar.gz
- cylinderMach20Reacting.tar.gz
